# Supplementary material for: Efficient production of (R)-3-TBDMSO glutaric acid methyl monoester by manipulating the substrate pocket of Pseudozyma antarctica lipase B
Source: Royal Society of Chemistry journal article supplement (doi:10.1039/c7ra06016e), 2017-01-01
Supplement: c7ra06016e1.pdf [file c7ra06016e1.pdf]

- Fig. S1 Hydrolytic activities of the A141S and wild-type (WT) CALB on *p*-NPs with varying carbon chain lengths (C2–C12). Relative enzyme activities depicted are the averages of three independent experiments, with error bars as indicated. Substrates: 4-nitrophenyl acetate (*p*-NPA), 4-nitrophenyl butyrate (*p*-NPB), 4-nitrophenyl octanoate (*p*-NPO), 4-nitrophenyl decanoate (*p*-NPDe), and 4-nitrophenyl dodecanoate (*p*-NPDo). **Substrate screening for characterizing the volume of the substrate pocket of CALB.** When the substrate was *p*-NPB, the gap of the relative activity between the A141S mutant and CALB (W-T) was larger than that of the others, which indicates that the cavity volume of the A141S mutant was reduced by 35.19 %. *p*-NPB was the best substrate for characterizing the volume of the substrate pocket of CALB.
- Fig. S2 Hydrolytic activity of CALB double mutants and liquid chromatographic analysis of the product of the A141S-A283V mutant. (A) Hydrolytic activity of CALB double mutants. (B) The liquid chromatograph of R-J<sub>6</sub> production by the A141S-A283V mutant.
- Fig.S3 Effect of initial pH, glucose concentration, fermentation time, and induction temperature on EF5 expression.
- Fig.S4 Effect of inducers on EF5 protein expression. (A) Effect of different inducers on EF5 protein expression. (B) Enhancing the protein expression by feeding 25 g/L glucose.
- Fig.S5 Optimization of the EF5 immobilization conditions. (A) CALB immobilization on carriers of differing particle size; immobilization rate (%)= activity of immobilized enzyme / total enzyme activity × 100%. (B) Effect of pH on EF5 immobilization; (C,D) Effect of temperature and time on EF5 immobilization; (E) Effect of enzyme: carrier ratio on EF5 immobilization
- Fig.S6 The liquid chromatograph of R-J<sub>6</sub> produced by the EF5 mutant. (A) The Standard of (R)-3-TBDMSO glutaric acid methyl monoester; (B) The racemate of 3-TBDMSO glutaric acid methyl monoester, the retention times of R-J<sub>6</sub> and S-J<sub>6</sub> were 6.6 and 7.0 min, respectively; (C) The liquid chromatograph of R-J<sub>6</sub> (concentrated reaction solution) by the EF5; (D) The liquid chromatograph of R-J<sub>6</sub> (purified product) by the EF5 mutant, with ee of 98.5%.
- Fig.S7 The HPLC data of the purified R-J<sub>6</sub> (final product) by the EF5. HPLC conditions: C18 column (250mm×4.6mm, 5mm), acetonitrile: water =1:9, UV 210 nm, 1 ml/min, 25 °C. Product purification process: an equal volume aqueous solution (pH 8.0) was added to the reaction solution, discarded the organic phase; Next, the aqueous phase was washed with MTBE three times; Then, the pH of the aqueous phase was adjusted to 6.0 with 0.5 M HCl, extracted with MTBE (three times), dried over anhydrous Na<sub>2</sub>SO<sub>4</sub>; The organic phase was concentrated by rotary evaporation and the target product has been harvested.

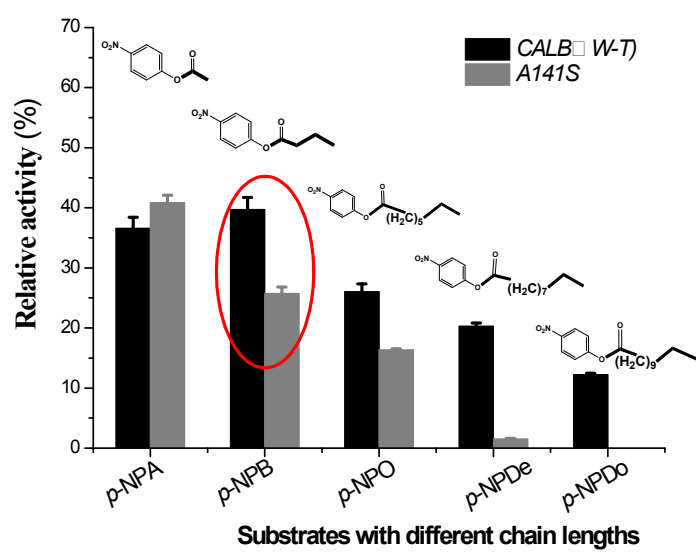

(Fig. S1)

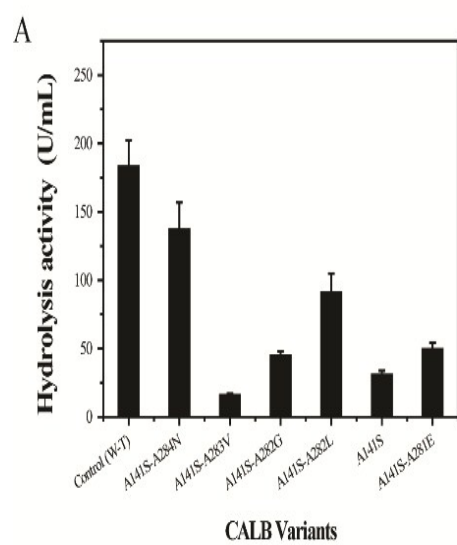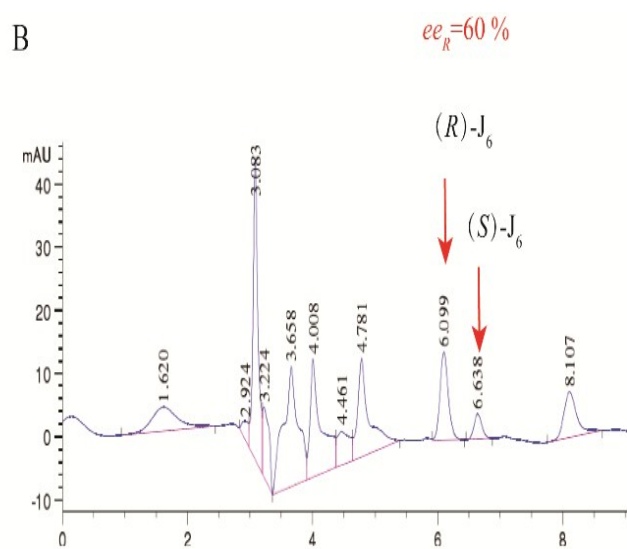

(Fig. S2)

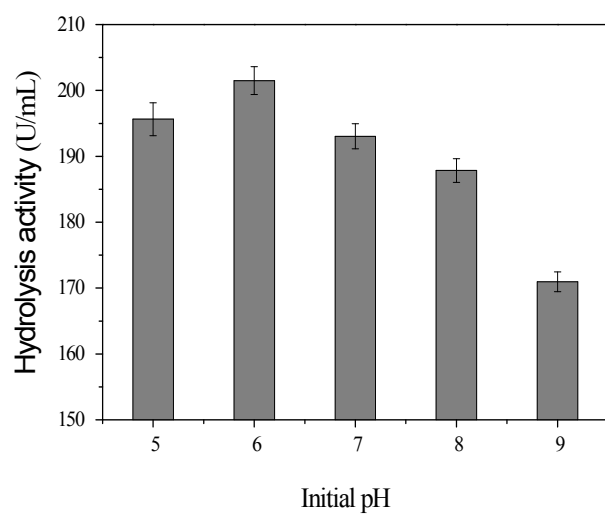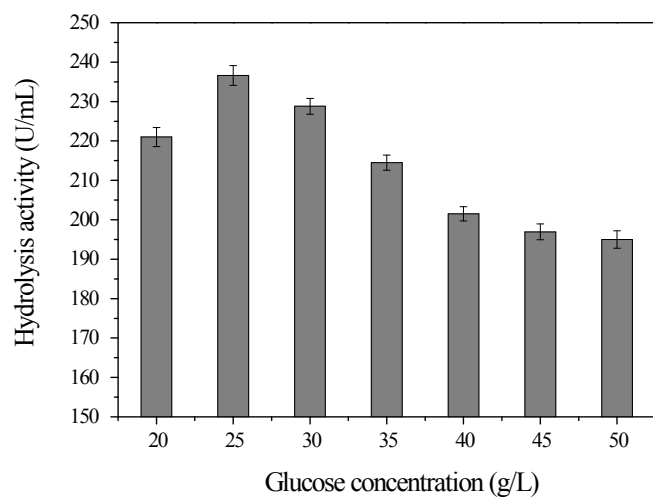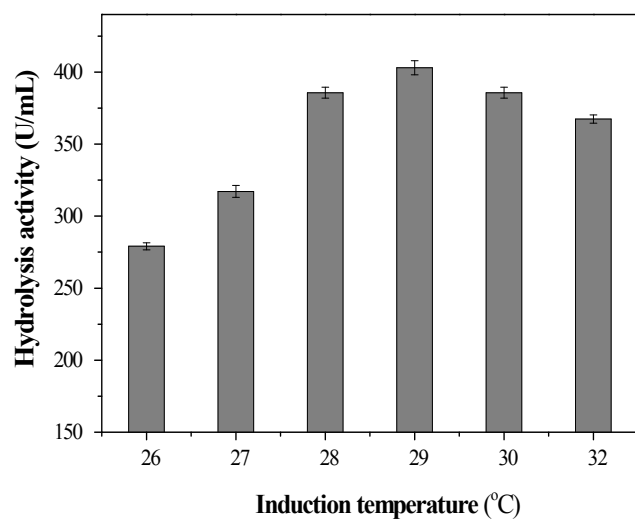

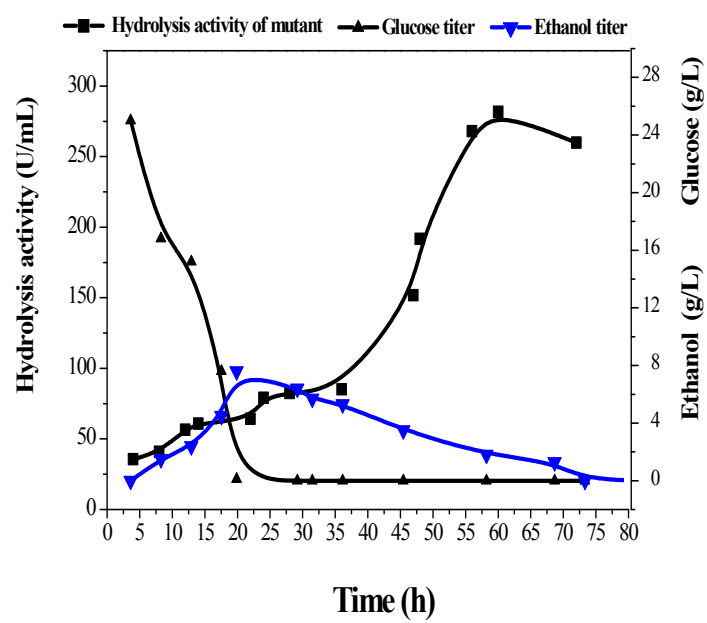

(Fig.S3)

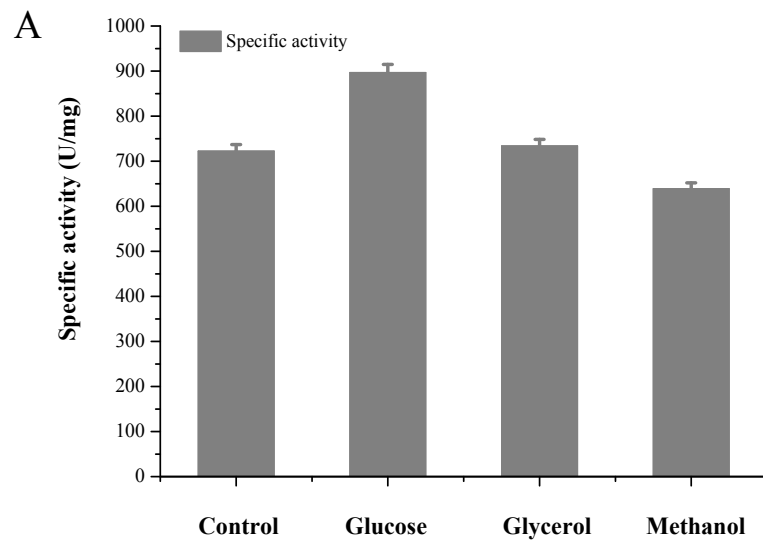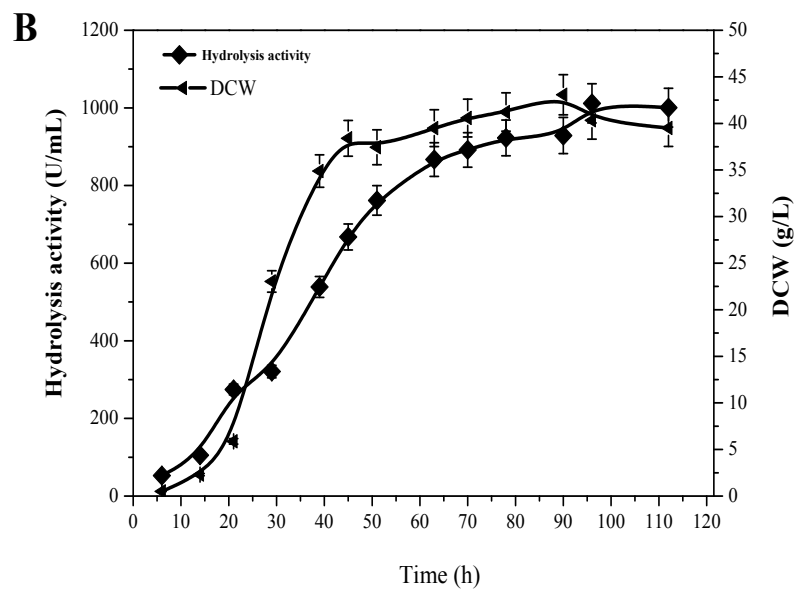

(Fig. S4)

A

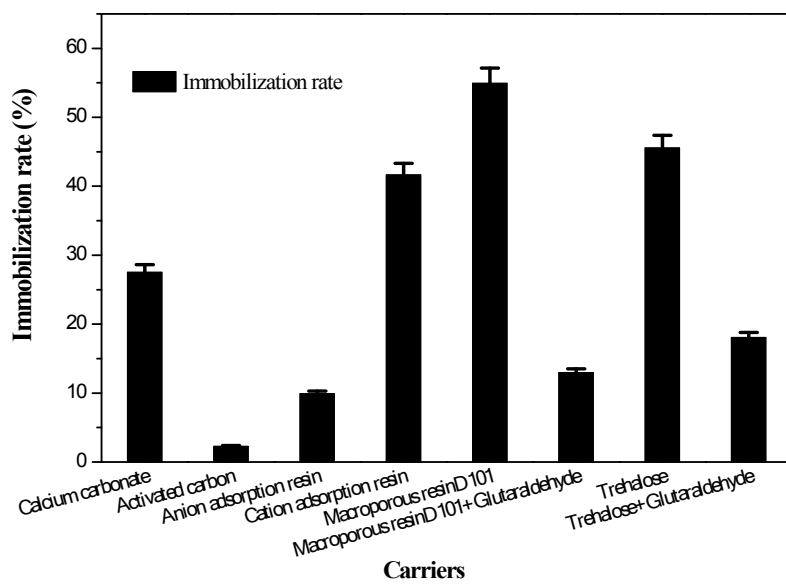

B

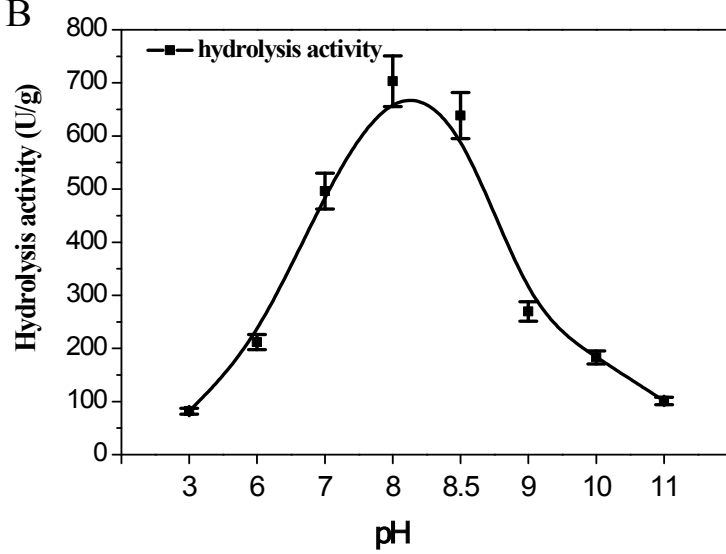

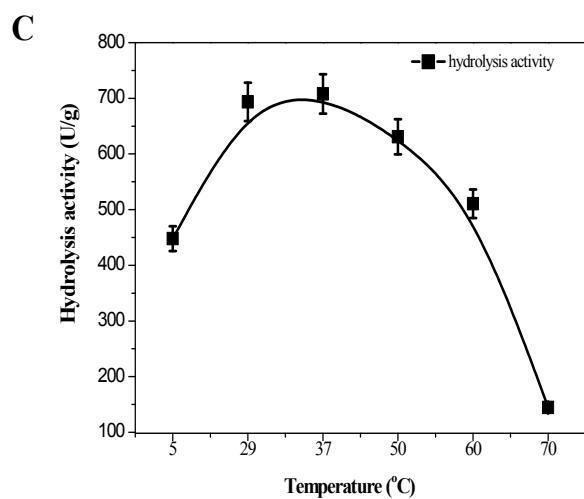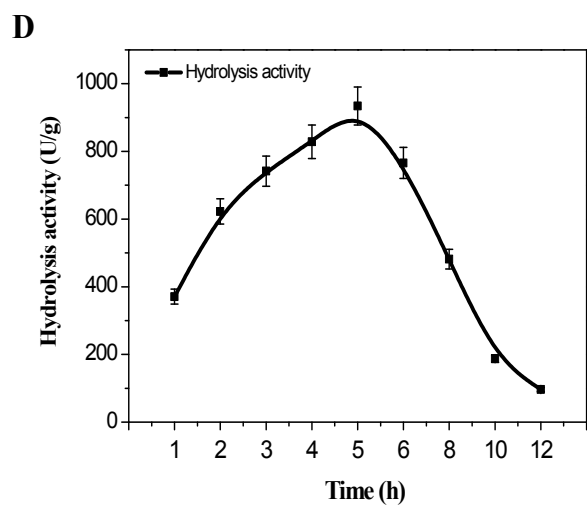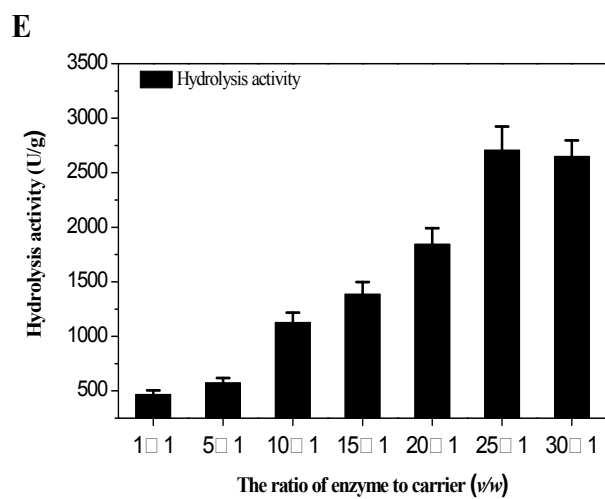

(Fig. S5)



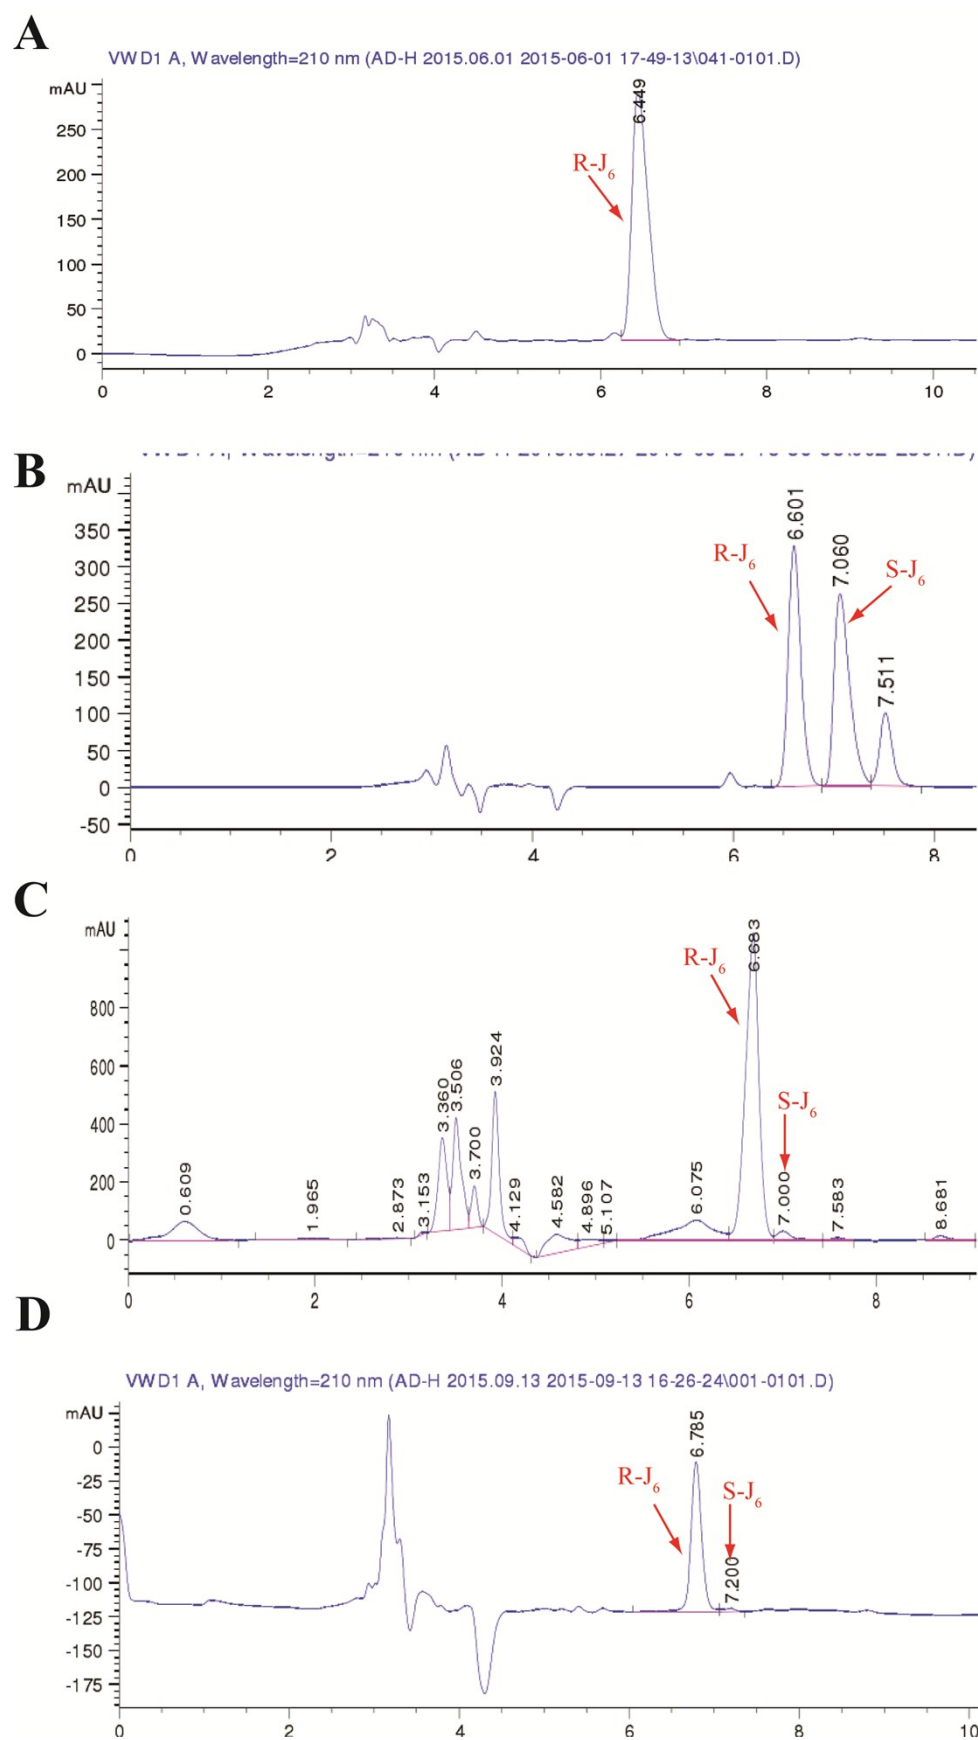

(Fig. S6)

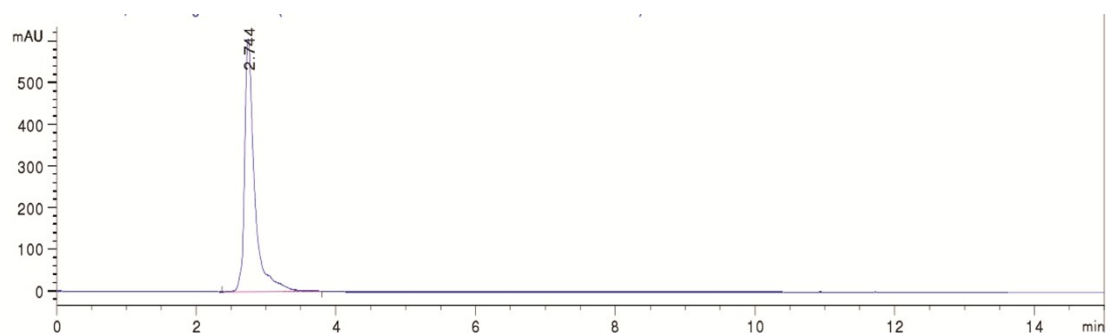

(Fig. S7)

Table S1 Highly frequent amino acids, as revealed by a multiple sequence alignment

| Candidate amino acids | Occurrence frequency (%) |             |      |     |
|-----------------------|--------------------------|-------------|------|-----|
|                       | S                        | D           | A    | T   |
| W104                  | 63.8                     | <b>10.7</b> | 7.9  | 6.2 |
| Q106                  | 93.7                     | <b>4.8</b>  | 1.1  | 1   |
| S47                   | 30.7                     | <b>27.4</b> | 24.7 | 5.3 |
| D134                  | 84.2                     | <b>11.1</b> | 10.6 | 3.2 |
| A141                  | 67.7                     | <b>7.1</b>  | 5.1  | 2   |
| G137                  | 99.5                     | <b>0.5</b>  | -    | -   |
| L278                  | 51.7                     | <b>21.2</b> | 11.9 | 3.4 |
| T138                  | 89.9                     | <b>10</b>   | 1    | 8.1 |
| I189                  | 58.6                     | <b>32.3</b> | 6.1  | 1   |

*Note: Candidate amino acids was selected by docking; Occurrence frequency was calculated by multiple sequence alignment.*

Table S2 Primers used for site-directed mutagenesis of the CALB gene

| Primer    | Sequence (5'- 3')                            |
|-----------|----------------------------------------------|
| T138A-For | CCGACTACAAGGGCGCCGTCCTCGCCGGCCC              |
| T138A-Rev | GGGCCGGCGAGGACGGCGCCCTTGTAGTCGG              |
| S47N-For  | CACCACAGGTCCACAGAACTTCGACTCGAACTGGA          |
| S47N-Rev  | TCCAGTTCGAGTCGAA <u>GT</u> TCTGTGGACCTGTGGTG |
| I189V-For | CGGCGACCGACGAGGTCGTTTCAGCCTCAGGT             |
| I189V-Rev | ACCTGAGGCTGAACGACCTCGTCGGTCGCCG              |
| A141S-For | AGGGCACCGTCCTCTCCGGCCCTCTCGATGC              |
| A141S-Rev | GCATCGAGAGGGCCGGAGAGGACGGTGCCCT              |
| D134S-For | TGGCCTTTGCGCCCTCGTACAAGGGCACCG               |
| D134S-Rev | CGGTGCCCTTGTACGAGGGCGCAAAGGCCA               |
| W104D-For | ACTCGCCCCTCGACGACTCGTACCTCTTC                |
| W104D-Rev | GAAGAGGTACGAGTCGTCGAGGGGCGAGT                |
| Q106H-For | CTTACGTGGTCTCACGGTGGGCTGGTGGC                |
| Q106H-Rev | GCCACCAGCCCACCGTGAGACCACGTAAG                |
| A283V-For | CGCCCCTGCGGCTGTGGCCATCATCGCGG                |
| A283V-Rev | CGCGATGATGGCCACAGCCGCAGGGGCG                 |

*Note: The mutated amino acids codons are underlined in bold.*

Table S3 Primers used for A141S-S283V semi-saturation/saturation mutagenesis

| Libraries   |           | The primers                                           |
|-------------|-----------|-------------------------------------------------------|
| Library I   | 189-190-S | GGCCACCGACGAGNNNNNNNCAGCCCCAGGTGTC                    |
|             | 189-190-A | GACACCTGGGGCTGNNNNNNCTCGTCGGTGGCC                     |
| Library II  | 134-138-S | GCGCCNNNTACAAGGGCNNNGTCCTCTCCGGC                      |
|             | 134-138-A | GCCGGAGAGGACNNNGCCCTTGTANNNGGGCGC                     |
| Library III | 278-282-S | GCGCTG <b>ND</b> TGCCCCTGC <b>ND</b> TTGCGGCCATCAT    |
|             | 278-282-A | ATGATGGCCGCA <b>AH</b> NGCAGGGGCA <b>HN</b> CAGCGC    |
| Library IV  | 42-47-S   | CAGGC <b>NDK</b> ACGGGTCCGGG <b>ANDK</b> TTCGACTCGAAC |
|             | 42-47-A   | GTTTCGAGTCGA <b>MH</b> NTCCCGGACCCGT <b>MH</b> NGCCTG |

*Mutations have been marked in bold.*

Table S4 Docking free energy and ee values of the variants

| Variants        | Docking Energy <sup>a</sup> |                           | $E_R/E_S^a$ | $R\text{-J}_6$ Titer(g/L) <sup>b</sup> | $ee_R^b$<br>(%) |
|-----------------|-----------------------------|---------------------------|-------------|----------------------------------------|-----------------|
|                 | $R\text{-J}_6$ (kcal/mol)   | $S\text{-J}_6$ (kcal/mol) |             |                                        |                 |
| S47N            | -88.49                      | -77.76                    | 1.138       | -                                      | -               |
| A141S           | -92.01                      | -82.22                    | 1.119       | 10.1                                   | 17.6            |
| W104D           | -88.9                       | -81.70                    | 1.089       | -                                      | -               |
| Q106H           | -105.93                     | -98.41                    | 1.076       | -                                      | -               |
| D134S           | -92.03                      | -88.44                    | 1.041       | -                                      | -               |
| T138A           | -92.09                      | -89.08                    | 1.034       | -                                      | -               |
| G137R           | -96.02                      | -93.59                    | 1.023       | -                                      | -               |
| WT <sup>b</sup> | -91.22                      | -93.477                   | 0.975       | 4.4                                    | -63             |
| L278I           | -84.13                      | -89.16                    | 0.944       | -                                      | -               |
| I189V           | -85.03                      | -96.55                    | 0.881       | -                                      | -               |

Note:  $E_R/E_S$  represents the ratio of the docking energy of the *R*-isomer to that of the *S*-isomer. WT, WT CALB;  $ee_R$  indicates the ee for  $R\text{-J}_6$ ;  $ee_S$  indicates the ee for  $S\text{-J}_6$ . a. the result was from molecular docking; b. it was experimental result.
